# Supplementary material
Source: MDPI journal article supplement (https://www.mdpi.com/2073-4395/13/10/2548)
Supplement: s1 [file s1]

Supplementary Materials

# Enhancing Efficiency of Enzymatic-Assisted Extraction Method for Evaluating Bioactive Compound Analysis in Mulberry: An Optimization Approach

Ainara Tizón Alba <sup>1</sup>, María José Aliaño-González <sup>1,2,\*</sup>, Miguel Palma <sup>1</sup>, Gerardo Fernández Barbero <sup>1</sup> and Ceferino Carrera <sup>1</sup>

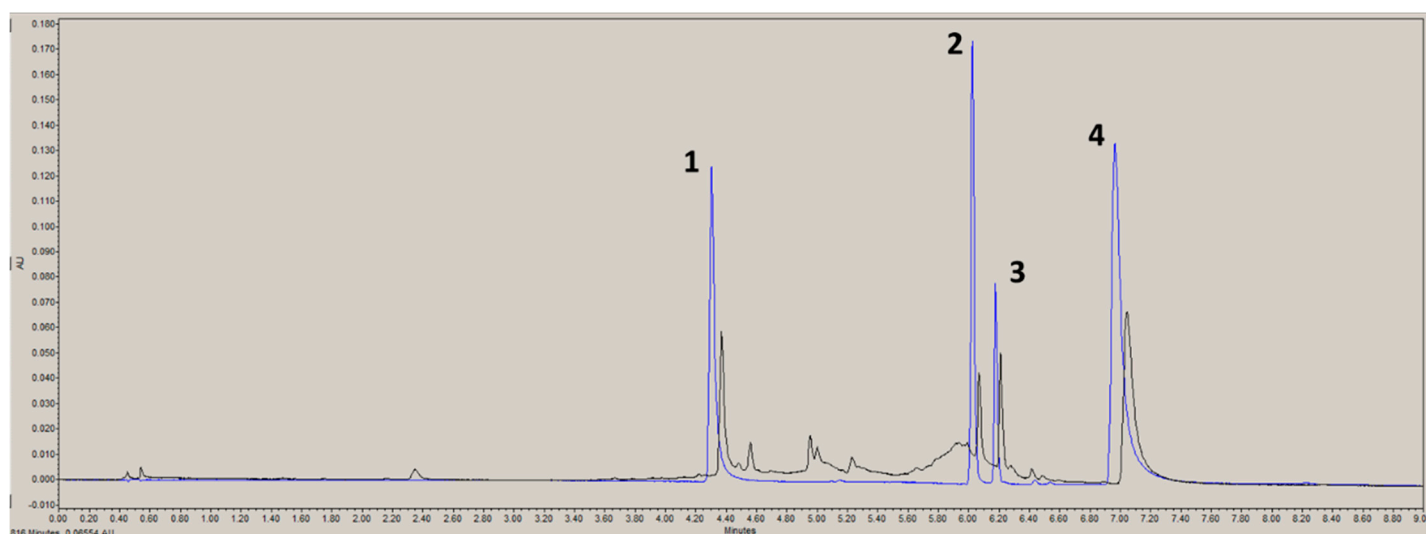

**Figure S1.** UV Chromatogram at 320 nm. In blue, a mixture of standards; in black, mulberry extract. 1. Chlorogenic acid, 2. Vanillic acid, 3. Rutin, 4. Resveratrol.

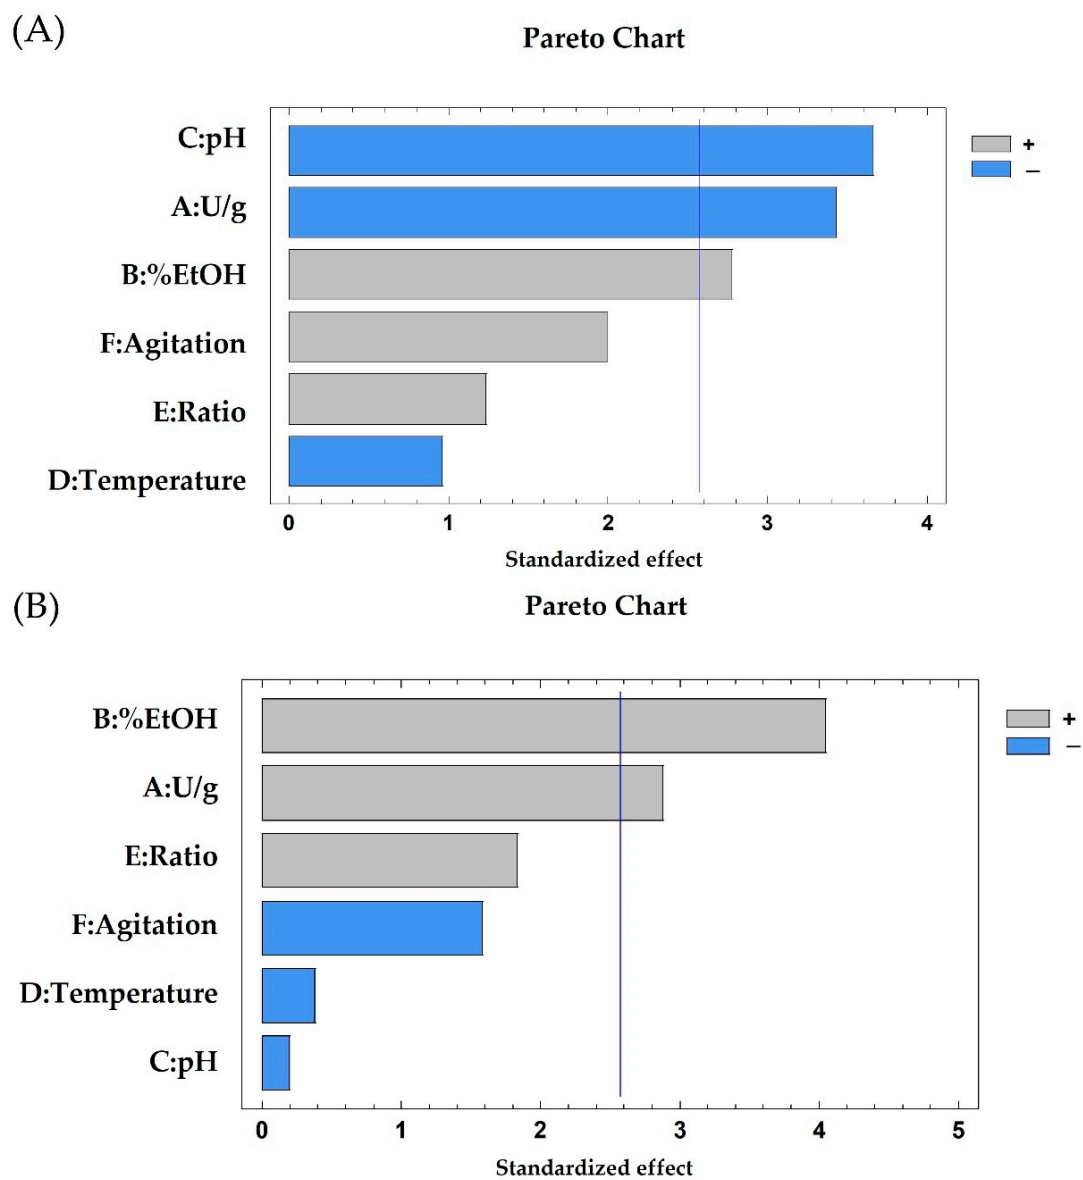

**Figure S2.** Pareto Chart for (A) anthocyanins (mg/100 g) and (B) phenolic compounds (mg/100 g) according to the analysis for PB.

**Table S1.** Experimental extraction conditions and total anthocyanins and phenolic compounds concentration (mg/ 100 g) obtained and adjusted to the 12 Plackett–Burman tests with six variables.

| Experiment | %<br>EtOH | pH | U/g  | Temp (°C) | Ratio (g/15 mL) | Agitation (rpm) | Total Anthocyanins<br>(mg/100 g) |          |         | Total Phenolic Compounds (mg/100<br>g) |          |         |
|------------|-----------|----|------|-----------|-----------------|-----------------|----------------------------------|----------|---------|----------------------------------------|----------|---------|
|            |           |    |      |           |                 |                 | Observed                         | Adjusted | % Error | Observed                               | Adjusted | % Error |
|            |           |    |      |           |                 |                 |                                  |          |         |                                        |          |         |
| 1          | 10        | 6  | 1000 | 40        | 0.1             | 50              | 4.27                             | 4.30     | 0.82    | 605.35                                 | 595.98   | 1.57    |
| 2          | 10        | 4  | 1000 | 40        | 0.2             | 200             | 25.79                            | 28.06    | 8.11    | 645.01                                 | 627.32   | 2.82    |
| 3          | 60        | 6  | 1000 | 40        | 0.2             | 200             | 137.22                           | 140.13   | 2.08    | 704.20                                 | 714.98   | 1.51    |
| 4          | 60        | 6  | 100  | 60        | 0.1             | 200             | 140.77                           | 126.78   | 11.03   | 649.85                                 | 607.20   | 7.02    |
| 5          | 10        | 6  | 100  | 60        | 0.2             | 50              | 4.06                             | 4.14     | 1.87    | 563.39                                 | 542.39   | 3.87    |
| 6          | 10        | 6  | 1000 | 60        | 0.1             | 200             | 6.28                             | 6.06     | 3.66    | 492.74                                 | 539.02   | 8.58    |
| 7          | 60        | 4  | 1000 | 60        | 0.1             | 50              | 142.23                           | 137.80   | 3.22    | 667.92                                 | 703.34   | 5.04    |
| 8          | 60        | 4  | 1000 | 60        | 0.2             | 50              | 132.47                           | 136.90   | 3.24    | 780.85                                 | 745.43   | 4.75    |
| 9          | 10        | 4  | 100  | 60        | 0.2             | 200             | 69.68                            | 73.81    | 5.59    | 544.26                                 | 561.63   | 3.09    |
| 10         | 60        | 4  | 100  | 40        | 0.1             | 200             | 114.80                           | 119.69   | 4.09    | 667.51                                 | 653.41   | 2.16    |
| 11         | 10        | 4  | 100  | 40        | 0.1             | 50              | 79.25                            | 77.96    | 1.66    | 532.09                                 | 546.50   | 2.64    |
| 12         | 60        | 6  | 100  | 40        | 0.2             | 50              | 112.93                           | 119.11   | 5.19    | 630.30                                 | 676.26   | 6.80    |

**Table S2.** Experimental extraction conditions and total anthocyanins and phenolic compounds concentration (mg/100 g) obtained and adjusted to the BBD-RSM.

| Experiment | pH | % EtOH | U/g | Total Anthocyanins (mg/100 g) |          |           | Total Phenolic Compounds (mg/100 g) |          |           |
|------------|----|--------|-----|-------------------------------|----------|-----------|-------------------------------------|----------|-----------|
|            |    |        |     | Observed                      | Adjusted | Error (%) | Observed                            | Adjusted | Error (%) |
| 1          | 5  | 60     | 300 | 118.81                        | 108.23   | 9.78      | 905.12                              | 860.90   | 5.14      |
| 2          | 5  | 40     | 550 | 23.93                         | 23.54    | 1.65      | 604.28                              | 576.66   | 4.79      |
| 3          | 4  | 80     | 300 | 120.44                        | 109.36   | 10.13     | 784.56                              | 805.82   | 2.64      |
| 4          | 5  | 80     | 550 | 102.81                        | 117.77   | 12.70     | 615.15                              | 620.23   | 0.82      |
| 5          | 4  | 60     | 550 | 85.49                         | 91.61    | 6.69      | 779.41                              | 753.07   | 3.50      |
| 6          | 6  | 60     | 50  | 77.79                         | 71.67    | 8.54      | 797.99                              | 776.73   | 2.74      |
| 7          | 5  | 40     | 50  | 65.02                         | 70.07    | 7.20      | 554.25                              | 547.88   | 1.16      |
| 8          | 6  | 60     | 550 | 97.18                         | 100.57   | 3.38      | 755.56                              | 760.90   | 0.70      |
| 9          | 6  | 80     | 300 | 91.90                         | 93.55    | 1.76      | 622.02                              | 560.90   | 10.90     |
| 10         | 5  | 60     | 300 | 102.54                        | 108.23   | 5.25      | 639.18                              | 645.55   | 0.99      |
| 11         | 5  | 60     | 300 | 103.34                        | 108.23   | 4.52      | 800.21                              | 801.49   | 0.16      |
| 12         | 4  | 40     | 300 | 7.45                          | 7.80     | 4.44      | 534.28                              | 561.90   | 4.92      |
| 13         | 5  | 80     | 50  | 14.88                         | 15.35    | 3.06      | 93.89                               | 88.81    | 5.72      |
| 14         | 4  | 60     | 50  | 96.10                         | 92.71    | 3.66      | 685.69                              | 684.40   | 0.19      |
| 15         | 6  | 40     | 300 | 18.45                         | 19.53    | 5.52      | 512.39                              | 538.73   | 4.89      |

**Table S3.** Values obtained from the ANOVA analysis of anthocyanins and phenolic compounds of mulberry by BBD-RSM.

| Source      | Anthocyanins   |         |                 | Phenolic Compounds |         |                 |
|-------------|----------------|---------|-----------------|--------------------|---------|-----------------|
|             | Sum of Squares | F-Value | <i>p</i> -Value | Sum of Squares     | F-Value | <i>p</i> -Value |
| A:U/g (mL)  | 8.27E+12       | 2.65    | 0.1642          | 9.16E+12           | 1.49    | 0.2763          |
| B:%EtOH     | 2.82E+13       | 9.05    | 0.0298          | 4.54E+11           | 0.07    | 0.7964          |
| C:pH        | 5.69E+12       | 1.83    | 0.2343          | 2.60E+11           | 0.04    | 0.8451          |
| AA          | 1.51E+12       | 0.49    | 0.5171          | 5.13E+12           | 0.84    | 0.4027          |
| AB          | 7.22E+12       | 2.32    | 0.1883          | 1.02E+13           | 1.66    | 0.2545          |
| AC          | 1.61E+12       | 0.52    | 0.5039          | 9.47E+11           | 0.15    | 0.7107          |
| BB          | 4.23E+12       | 1.36    | 0.2963          | 3.41E+13           | 5.56    | 0.0649          |
| BC          | 1.29E+13       | 4.14    | 0.0974          | 1.07E+12           | 0.17    | 0.6943          |
| CC          | 2.99E+11       | 0.10    | 0.7690          | 2.32E+12           | 0.38    | 0.5653          |
| Total Error | 1.56E+13       |         |                 | 6.14E+12           |         |                 |
